# Supplementary material for: NMR spectroscopic studies of a TAT-derived model peptide in imidazolium-based ILs: influence on chemical shifts and the cis/trans equilibrium state
Source: Royal Society of Chemistry journal article supplement (doi:10.1039/c7cp03295a), 2017-01-01
Supplement: c7cp03295a1.pdf [file c7cp03295a1.pdf]

## Supplementary Material

# NMR spectroscopic studies of a TAT-derived model peptide in imidazolium-based ILs: influence on chemical shifts and the *cis/trans* equilibrium state

Christoph Wiedemann<sup>1</sup>, Oliver Ohlenschäger<sup>2</sup>, Carmen Mrestani-Klaus<sup>1</sup>, and  
Frank Bordusa<sup>1,\*</sup>

<sup>1</sup>*Institute of Biochemistry and Biotechnology, Martin-Luther-University Halle-Wittenberg, Kurt-Mothes-Str. 3, 06120  
Halle, Germany*

<sup>2</sup>*Leibniz Institute on Aging - Fritz Lipmann Institute, Beutenbergstr. 11, 07745 Jena, Germany*

\* *Corresponding author: frank.bordusa@biochemtech.uni-halle.de*

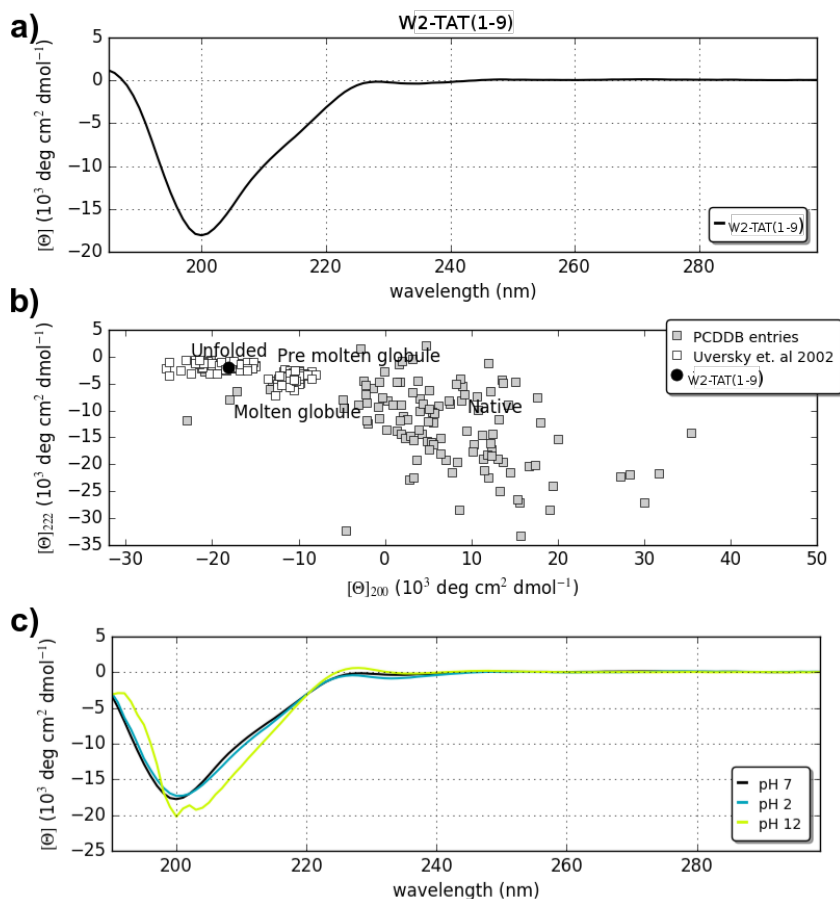

**Fig. S 1:** **a)** Far UV-CD spectra of the W2-TAT(1-9) peptide dissolved in water. Circular dichroism (CD) spectra were recorded on a JASCO J-710 CD spectropolarimeter at 303.2 K in a 1 mm quartz cuvette to estimate the secondary structure content. The instrument was calibrated with D-10-camphorsulphonic acid (Sigma Aldrich). The peptide concentration was 157  $\mu\text{M}$  and verified spectrophotometrically at 280 nm with the extinction coefficient calculated using ProtParam (<http://web.expasy.org/protparam/>). Each CD spectrum represents the average of 3 accumulated scans at 20 nm/ min with a 1 nm slit width and a time constant of 2 s for a nominal resolution of 0.7 nm. Data were collected between 185 and 320 nm by taking points every 1 nm. No further zeroing was applied after background subtraction. Data were processed and visualized with CAPITO [1]. **b)** The ‘double wavelength’ plot ( $[\Theta]_{200}$  plotted versus  $[\Theta]_{222}$ ) allows to deduce the folding state of TAT(W2) [2]. **c)** Far UV-CD spectra of the TAT(W2) collected at pH 7 (black), pH 2 (blue) and pH 12 (green). Experimental conditions as described above.

**Table S 1:** The secondary structure elements of W2-TAT(1-9) estimated from CD spectrum. Estimation of structural contents are given in percent.

|                                            | helical | $\beta$ -strand | irregular |
|--------------------------------------------|---------|-----------------|-----------|
| CAPITO <sup>a</sup>                        | 4–13    | 18–41           | 55–69     |
| SELCON3 <sup>b</sup>                       | 10      | 29              | 61        |
| CONTIN <sup>b</sup>                        | 8       | 33              | 59        |
| CDSSTR <sup>b</sup>                        | 6       | 33              | 61        |
| DSSP <i>trans</i> W2-TAT(1-9) <sup>c</sup> | 0       | 33              | 67        |
| DSSP <i>cis</i> W2-TAT(1-9) <sup>c</sup>   | 0       | 55              | 45        |

<sup>a</sup> [1]

<sup>b</sup> included in the software CDPro [3]

<sup>c</sup> secondary structure determination based on the ROE calculated structures [4]

**Table S 2:**  $^1\text{H}$ ,  $^{13}\text{C}$  and  $^{15}\text{N}$  chemical shift assignments of the *trans* configured W2-TAT(1-9) peptide in aqueous solution (90%  $\text{H}_2\text{O}$ /10%  $\text{D}_2\text{O}$  (v/v), pH 6.5) at 303.2 K

|    | H    | N      | $\text{N}^\delta$ | $\text{N}^\epsilon$ | $\text{H}^\alpha$ | $\text{H}^\beta$ | $\text{H}^\gamma$ | $\text{H}^\delta$ | $\text{H}^\epsilon$ | $\text{H}^\zeta$ | $\text{H}^\eta$ | C      | $\text{C}^\alpha$ | $\text{C}^\beta$ | $\text{C}^\gamma$ | $\text{C}^\delta$ | $\text{C}^\epsilon$ | $\text{C}^\zeta$ | $\text{C}^\eta$ |
|----|------|--------|-------------------|---------------------|-------------------|------------------|-------------------|-------------------|---------------------|------------------|-----------------|--------|-------------------|------------------|-------------------|-------------------|---------------------|------------------|-----------------|
| M1 |      |        |                   |                     | 3.92              | 2.03,2.03        | 2.48,2.48         |                   | 2.02                |                  |                 | 172.62 | 55.31             | 33.18            | 30.93             |                   | 16.76               |                  |                 |
| W2 |      |        |                   | 129.38              | 5.02              | 3.15,3.34        |                   | 7.29              | 10.13,7.71          | 7.18,7.51        | 7.26            | 174.10 | 55.14             | 29.10            | 111.33            | 129.47,127.70     | 120.97,138.89       | 122.25,114.86    | 124.83          |
| P3 |      |        |                   |                     | 4.45              | 2.24,1.89        | 1.96,1.96         | 3.78,3.49         |                     |                  |                 | 176.48 | 63.31             | 31.99            | 27.30             | 50.86             |                     |                  |                 |
| V4 | 8.00 | 119.83 |                   |                     | 4.09              | 2.01             | 0.92,0.92         |                   |                     |                  |                 | 175.65 | 62.05             | 33.03            | 20.48,20.48       |                   |                     |                  |                 |
| D5 | 8.31 | 125.63 |                   |                     | 4.84              | 2.54,2.79        |                   |                   |                     |                  |                 | 174.81 | 52.06             | 41.54            | 179.94            |                   |                     |                  |                 |
| P6 |      |        |                   |                     | 4.41              | 2.22,1.93        | 1.95,1.95         | 3.81,3.81         |                     |                  |                 | 176.80 | 63.50             | 32.19            | 26.94             | 50.88             |                     |                  |                 |
| N7 | 8.52 | 118.03 | 114.08            |                     | 4.68              | 2.80,2.75        |                   | 7.76,6.90         |                     |                  |                 | 175.08 | 53.74             | 38.96            | 177.29            |                   |                     |                  |                 |
| I8 | 7.75 | 120.40 |                   |                     | 4.19              | 1.90             | 0.90,1.42,1.16    | 0.86              |                     |                  |                 | 175.19 | 61.34             | 38.97            | 27.07,17.50       | 12.98             |                     |                  |                 |
| E9 | 7.89 | 129.76 |                   |                     | 4.11              | 1.99,1.88        | 2.18,2.18         |                   |                     |                  |                 | 180.92 | 58.19             | 31.30            | 36.67             | 184.64            |                     |                  |                 |

**Table S 3:**  $^1\text{H}$ ,  $^{13}\text{C}$  and  $^{15}\text{N}$  chemical shift assignments of the *cis* configured W2-TAT(1-9) peptide in aqueous solution (90%  $\text{H}_2\text{O}$ /10%  $\text{D}_2\text{O}$  (v/v), pH 6.5) at 303.2 K

|    | H    | N      | $\text{N}^\delta$ | $\text{N}^\epsilon$ | $\text{H}^\alpha$ | $\text{H}^\beta$ | $\text{H}^\gamma$ | $\text{H}^\delta$ | $\text{H}^\epsilon$ | $\text{H}^\zeta$ | $\text{H}^\eta$ | C      | $\text{C}^\alpha$ | $\text{C}^\beta$ | $\text{C}^\gamma$ | $\text{C}^\delta$ | $\text{C}^\epsilon$ | $\text{C}^\zeta$ | $\text{C}^\eta$ |
|----|------|--------|-------------------|---------------------|-------------------|------------------|-------------------|-------------------|---------------------|------------------|-----------------|--------|-------------------|------------------|-------------------|-------------------|---------------------|------------------|-----------------|
| M1 |      |        |                   |                     | 4.15              | 2.16,2.16        | 2.61,2.61         |                   | 2.15                |                  |                 | 171.85 | 55.29             | 33.16            | 30.89             |                   | 16.81               |                  |                 |
| W2 |      |        |                   | 130.13              | 4.58              | 3.29,3.16        |                   | 7.27              | 10.21,7.60          | 7.17,7.52        | 7.26            | 173.88 | 56.41             | 30.89            | 110.89            | 129.41,127.48     | 120.86,138.97       | 122.25,114.86    | 124.81          |
| P3 |      |        |                   |                     | 3.38              | 1.60,1.07        | 1.42,1.47         | 3.21,3.37         |                     |                  |                 | 175.62 | 62.97             | 33.49            | 24.36             | 49.99             |                     |                  |                 |
| V4 | 7.83 | 120.82 |                   |                     | 3.84              | 1.99             | 0.89,0.89         |                   |                     |                  |                 | 175.77 | 63.21             | 32.48            | 21.07,21.07       |                   |                     |                  |                 |
| D5 | 8.02 | 124.23 |                   |                     | 4.82              | 2.74,2.47        |                   |                   |                     |                  |                 | 174.79 | 51.96             | 41.61            | 179.74            |                   |                     |                  |                 |
| P6 |      |        |                   |                     | 4.40              | 2.22,1.95        | 1.93,1.93         | 3.77,3.77         |                     |                  |                 | 176.90 | 63.50             | 32.17            | 26.89             | 50.84             |                     |                  |                 |
| N7 | 8.50 | 117.99 | 114.03            |                     | 4.66              | 2.80,2.74        |                   | 7.72,6.89         |                     |                  |                 | 174.89 | 53.75             | 38.97            | 177.38            |                   |                     |                  |                 |
| I8 | 7.80 | 120.46 |                   |                     | 4.19              | 1.90             | 1.16,1.42,0.88    | 0.85              |                     |                  |                 | 175.19 | 61.32             | 38.96            | 27.06,17.46       | 12.98             |                     |                  |                 |
| E9 | 7.88 | 129.58 |                   |                     | 4.11              | 2.00,1.87        | 2.18,2.18         |                   |                     |                  |                 | 180.90 | 58.19             | 31.30            | 36.67             | 184.59            |                     |                  |                 |

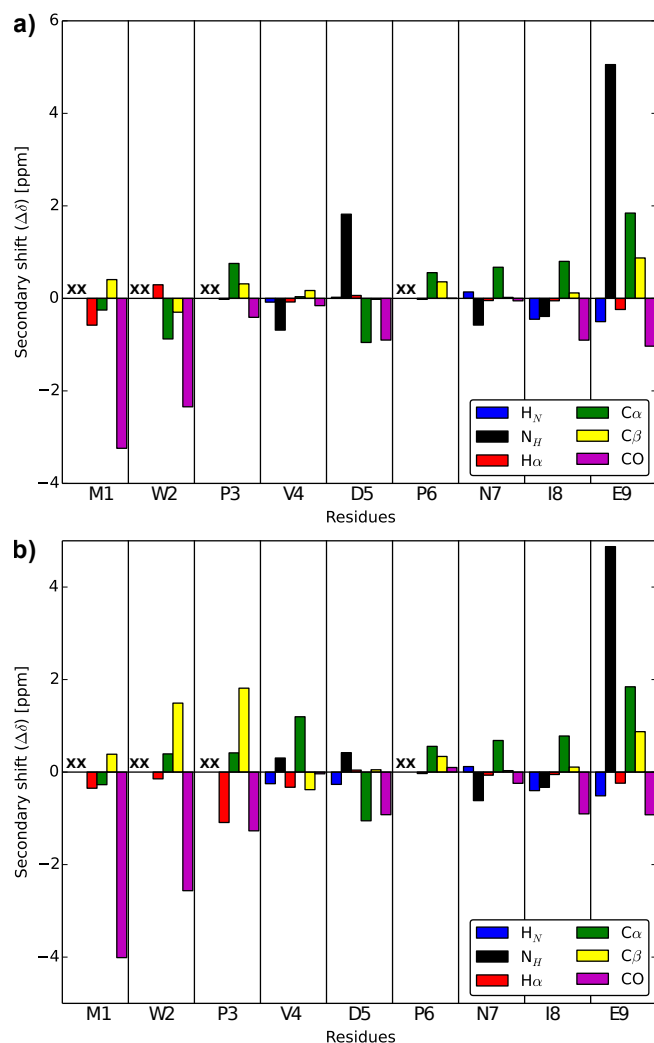

**Fig. S 2:** Secondary chemical shifts of the W2-TAT(1-9) *all-trans* (a) and *cis* (b) isoform. Secondary shifts are defined as the difference between the observed chemical shift and the corresponding random coil value. Random coil chemical shifts of the W2-TAT(1-9) peptide were calculated using the CamCoil webserver [5].

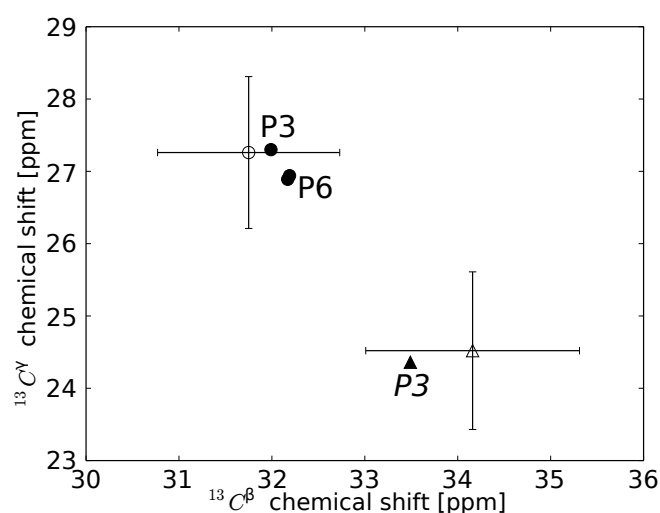

**Fig. S 3:** Proline  $^{13}\text{C}^\beta$  and  $^{13}\text{C}^\gamma$  chemical shift analysis for the *cis*- and *all-trans*-configured W2-TAT(1-9) peptide. Filled circles and filled triangle correspond to the chemical shifts characteristics of the numbered amino acids. The average  $^{13}\text{C}^\beta$  and  $^{13}\text{C}^\gamma$  chemical shifts for *cis* and *trans* proline is given by open triangle and open circle, respectively [6, 7]. Standard deviations are indicated by bars.

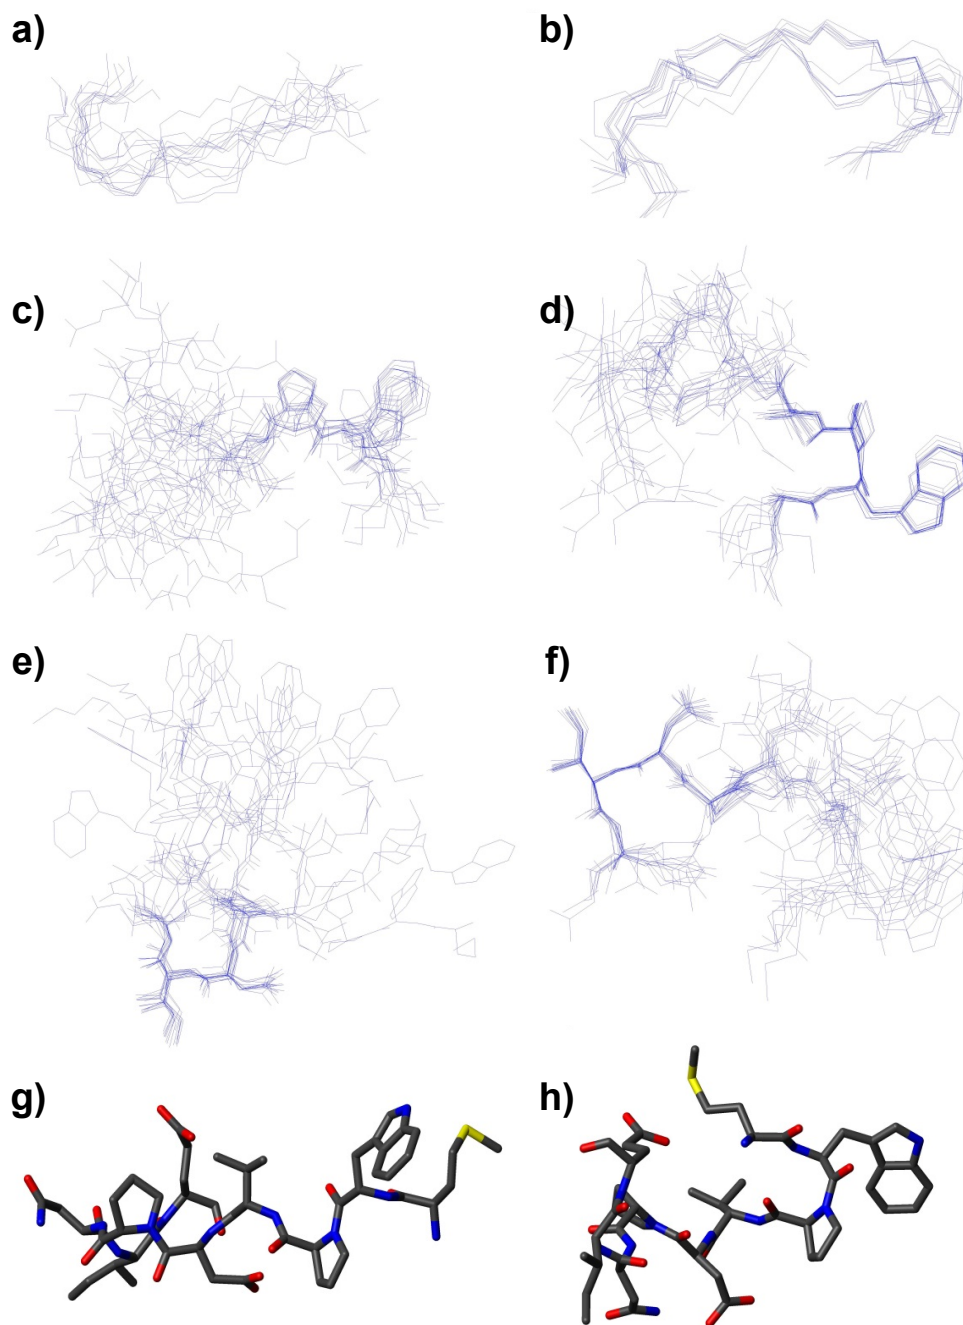

**Fig. S 4:** NMR solution structures of the *all-trans* (a,c,e,g) and *cis* (b,d,f,h) isoform of the W2-TAT(1-9) peptide. (a,b) Superimposed backbone traces for the 15 structures with the lowest energy after OPAL refinement. In the *all-trans* conformer residues 6-9 superimpose with a backbone r.m.s.d. of 0.58 and resemble a turn-like structure (e) whilst the more N-terminal residues are disordered (c). In contrast, in the *cis* conformer the residues M1-V4 (d) and P6-E9 (f) superimpose with r.m.s.d. values of 0.23 and 0.30, respectively, indicating the higher structural definition of the *cis* conformer. Although no standard turn elements could be deduced, in both, the N- and C-terminal stretches these loop elements revert the backbone direction by 180° (*all-trans* (g), *cis* (h)).

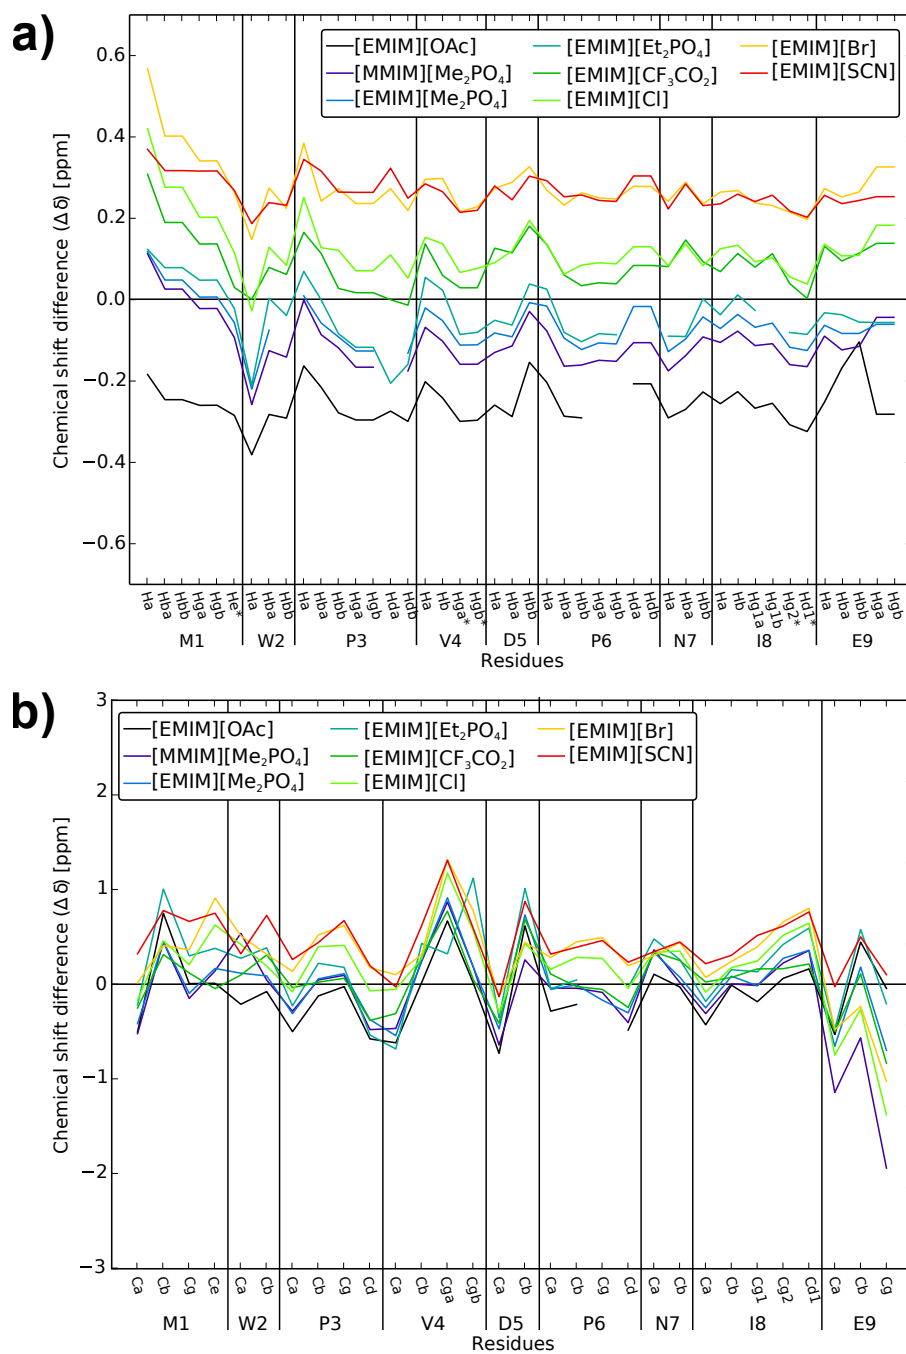

**Fig. S 5:**  $^1\text{H}$  (a) and  $^{13}\text{C}$  (b) NMR chemical shift differences ( $\Delta\delta$ ) of *all-trans*-configured W2-TAT(1-9) in various IL/ solvent systems at 303 K. W2-TAT(1-9) concentration in IL/ solvent systems was 90 mM and 10 mM in the reference water system, respectively. The IL concentration was 3 M (approximately 70% IL/30% D<sub>2</sub>O v/v). In all experiments pH was adjusted to 6.5.

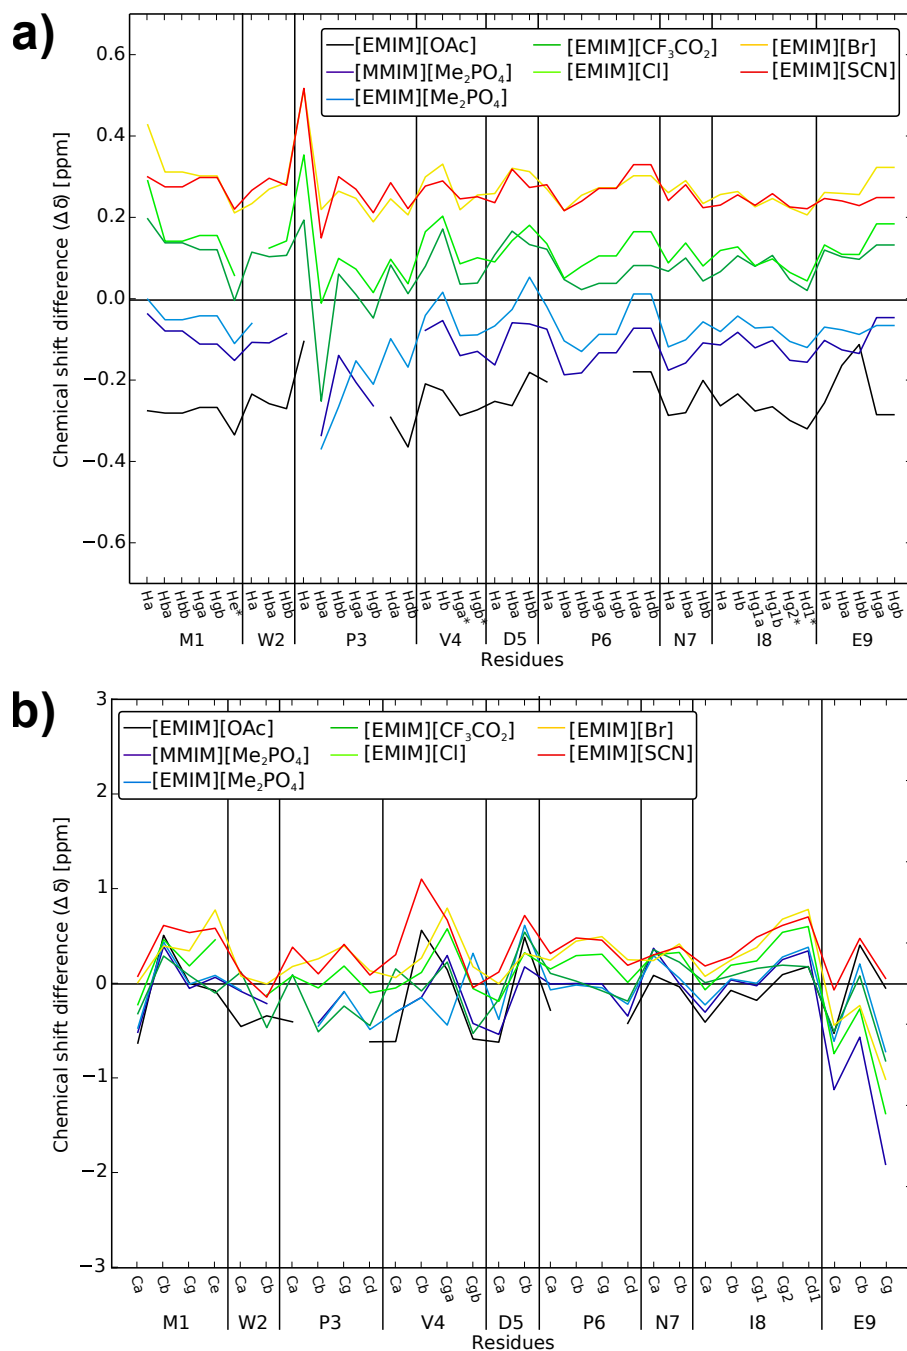

**Fig. S 6:**  $^1\text{H}$  (a) and  $^{13}\text{C}$  (b) NMR chemical shift differences ( $\Delta\delta$ ) of *cis*-configured W2-TAT(1-9) in various IL solvent systems at 303 K. W2-TAT(1-9) concentration in IL/ solvent systems was 90 mM and 10 mM in the reference water system, respectively. The IL concentration was 3 M (approximately 70% IL/30% D<sub>2</sub>O v/v). In all experiments pH was adjusted to 6.5. The spectral quality of the 3M [EMIM][Et<sub>2</sub>PO<sub>4</sub>] sample allows only the assignment of a few unambiguous *cis*-configured W2-TAT(1-9) signals.

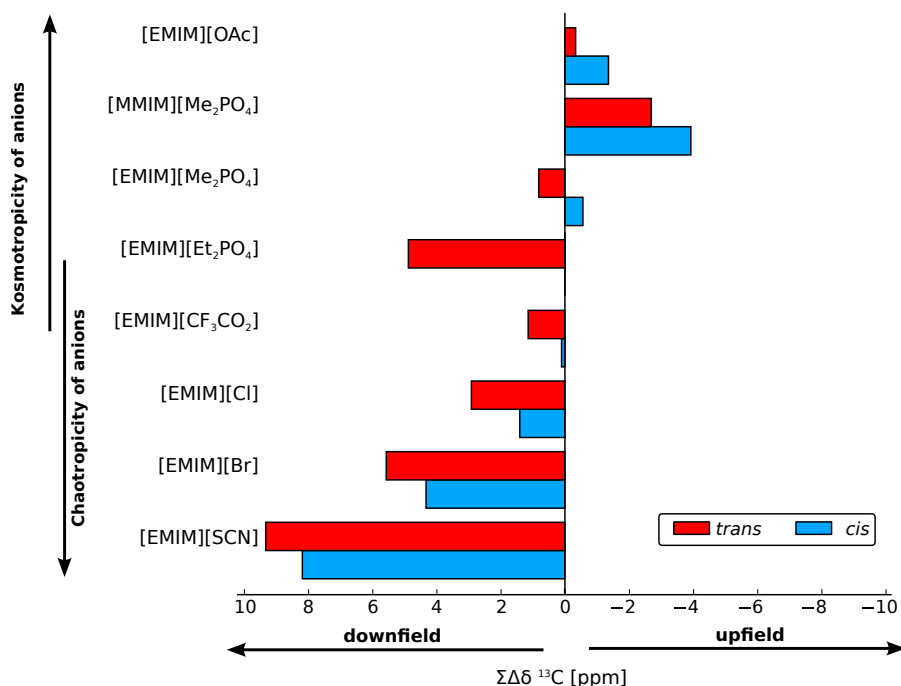

**Fig. S 7:** Summed up  $^{13}\text{C}$  chemical shift differences ( $\sum \Delta\delta$ ) of selected carbons for *cis*-(blue) and *all-trans*-configured (red) W2-TAT(1-9) peptide in different IL solvent systems.

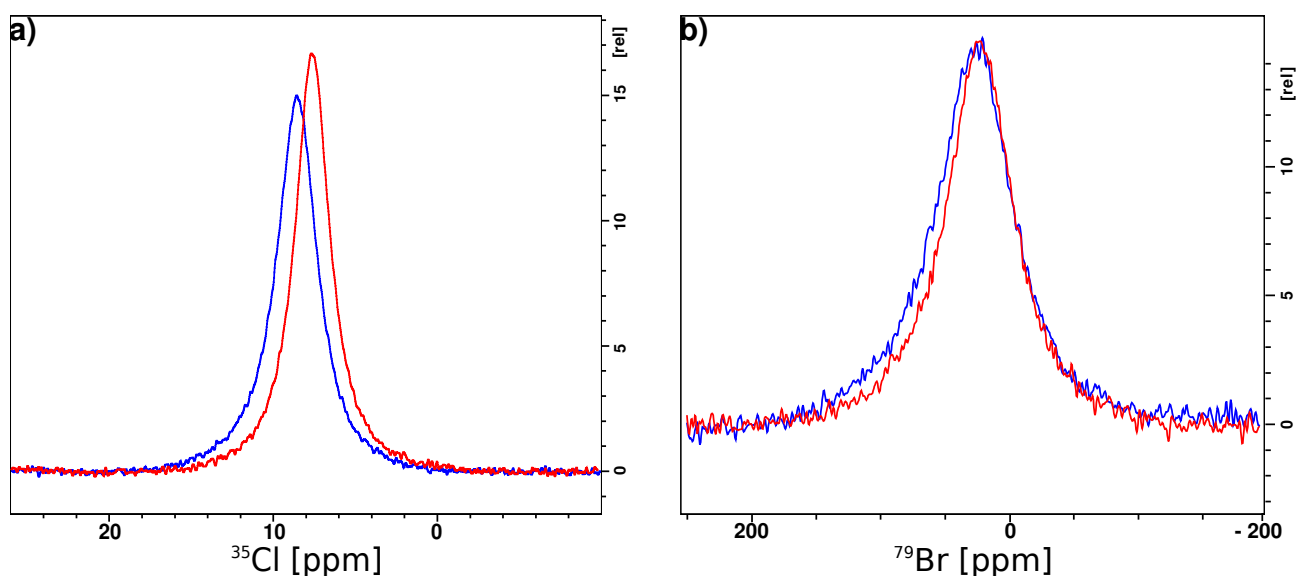

**Fig. S 8:** **a)**  $^{35}\text{Cl}$  chemical shifts of pure [EMIM][Cl] (7.66 ppm, red line) and in the presence of 10 mM W2-TAT(1-9) peptide (8.56 ppm, blue line). **b)**  $^{79}\text{Br}$  chemical shifts of pure [EMIM][Br] (23.6 ppm, red line) and in the presence of 10 mM W2-TAT(1-9) peptide (30.7 ppm, blue line). Spectra were collected at 303 K on a Bruker 400 MHz AvanceIII system equipped with a 5 mm room-temperature double resonance broad band probe and 32 transients. The probe was tuned to the appropriate frequencies. The spectral width for  $^{35}\text{Cl}$  was 2354 Hz with transmitter frequency offset of 0 Hz and acquisition time was 0.217 s with a recycle delay of 1 s. The  $^{35}\text{Cl}$  pulse length was 14  $\mu\text{s}$  at 90 W. The spectral width for  $^{79}\text{Br}$  was 10 kHz with transmitter frequency offset of 1303.23 Hz and acquisition time was 0.00512 s with a recycle delay of 1 s. The  $^{79}\text{Br}$  pulse length was 8  $\mu\text{s}$  at 60 W. The  $^{35}\text{Cl}$  chemical shifts were referenced to 0.1 M NaCl solution in  $\text{D}_2\text{O}$ . The  $^{79}\text{Br}$  chemical shifts were referenced to 0.1 M KBr solution in  $\text{D}_2\text{O}$ .



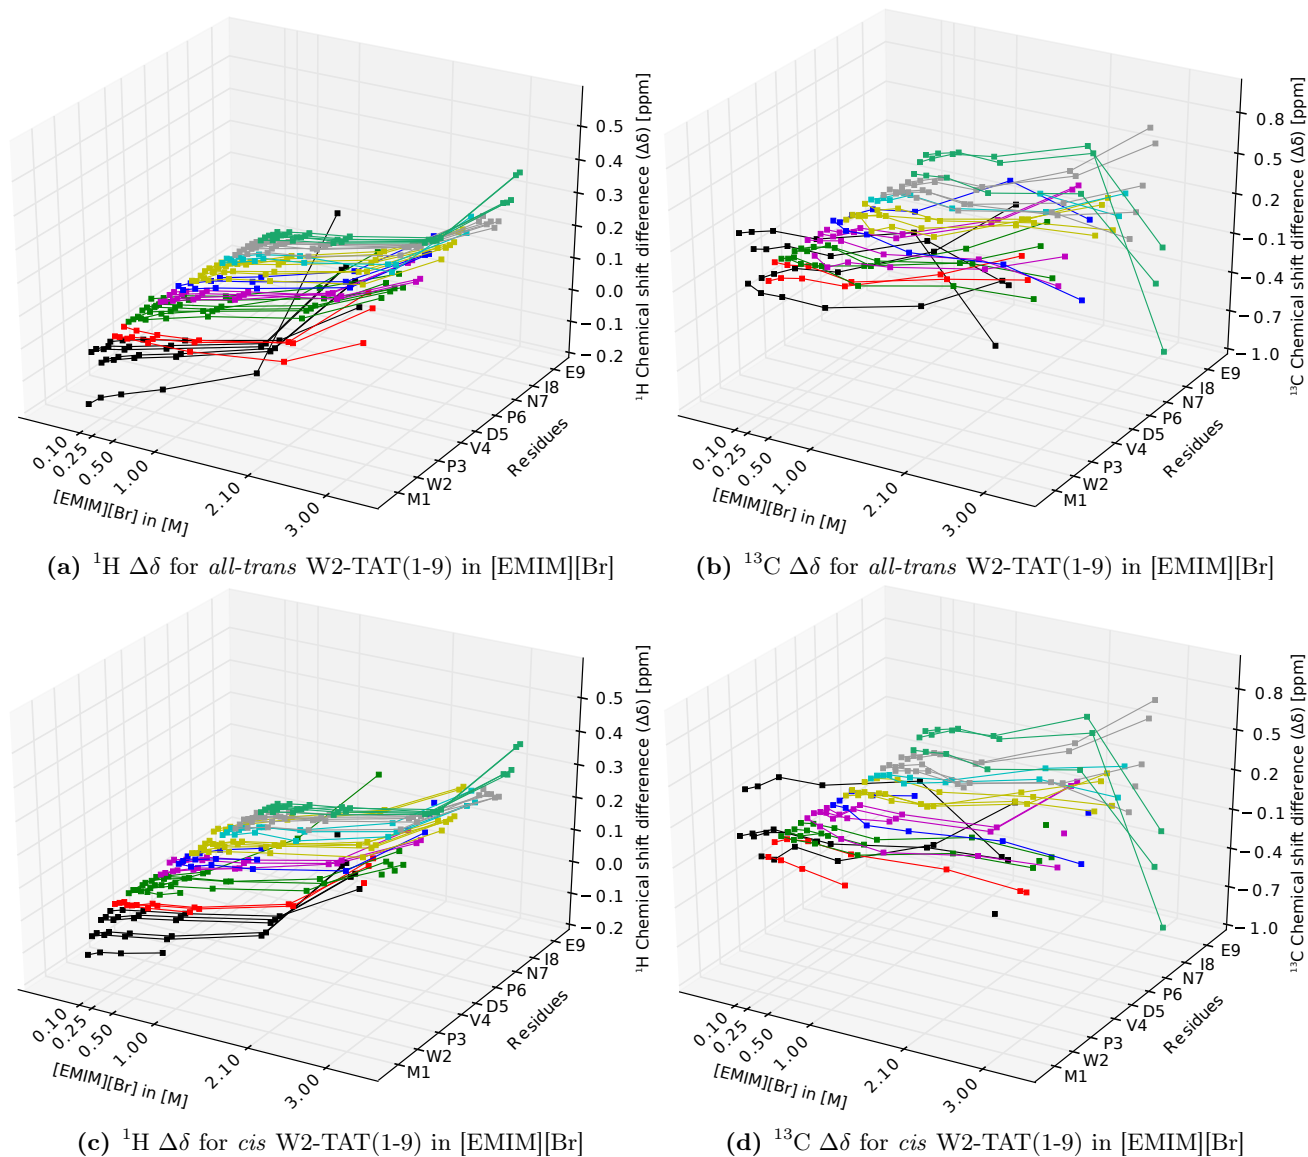

**Fig. S 9:**  $^1\text{H}$  and  $^{13}\text{C}$  chemical shift differences ( $\Delta\delta$ ) of protons and carbons for *all-trans*- (upper panel) and *cis*-configured (lower panel) W2-TAT(1-9) as function of [EMIM][Br] concentration. The reference system was 10 mM W2-TAT(1-9), pH 6.5, in 90/10%  $\text{H}_2\text{O}/\text{D}_2\text{O}$ . The peptide concentration was 10 mM for samples up to 2.1 M [EMIM][Br] and experiments were carried out with a 5 mm room-temperature BBI-probe. Spectra for 3 M [EMIM][Br] were carried out with a 4 mm triple resonance HR-MAS probe at 6 kHz spinning rate and a W2-TAT(1-9) concentration of 90 mM. All NMR experiments were acquired at 303 K and the pH was adjusted to 6.5. Depicted are all  $^1\text{H}$  and  $^{13}\text{C}$   $\Delta\delta$  in sequential order per residue as given in Fig. S5 and S6.

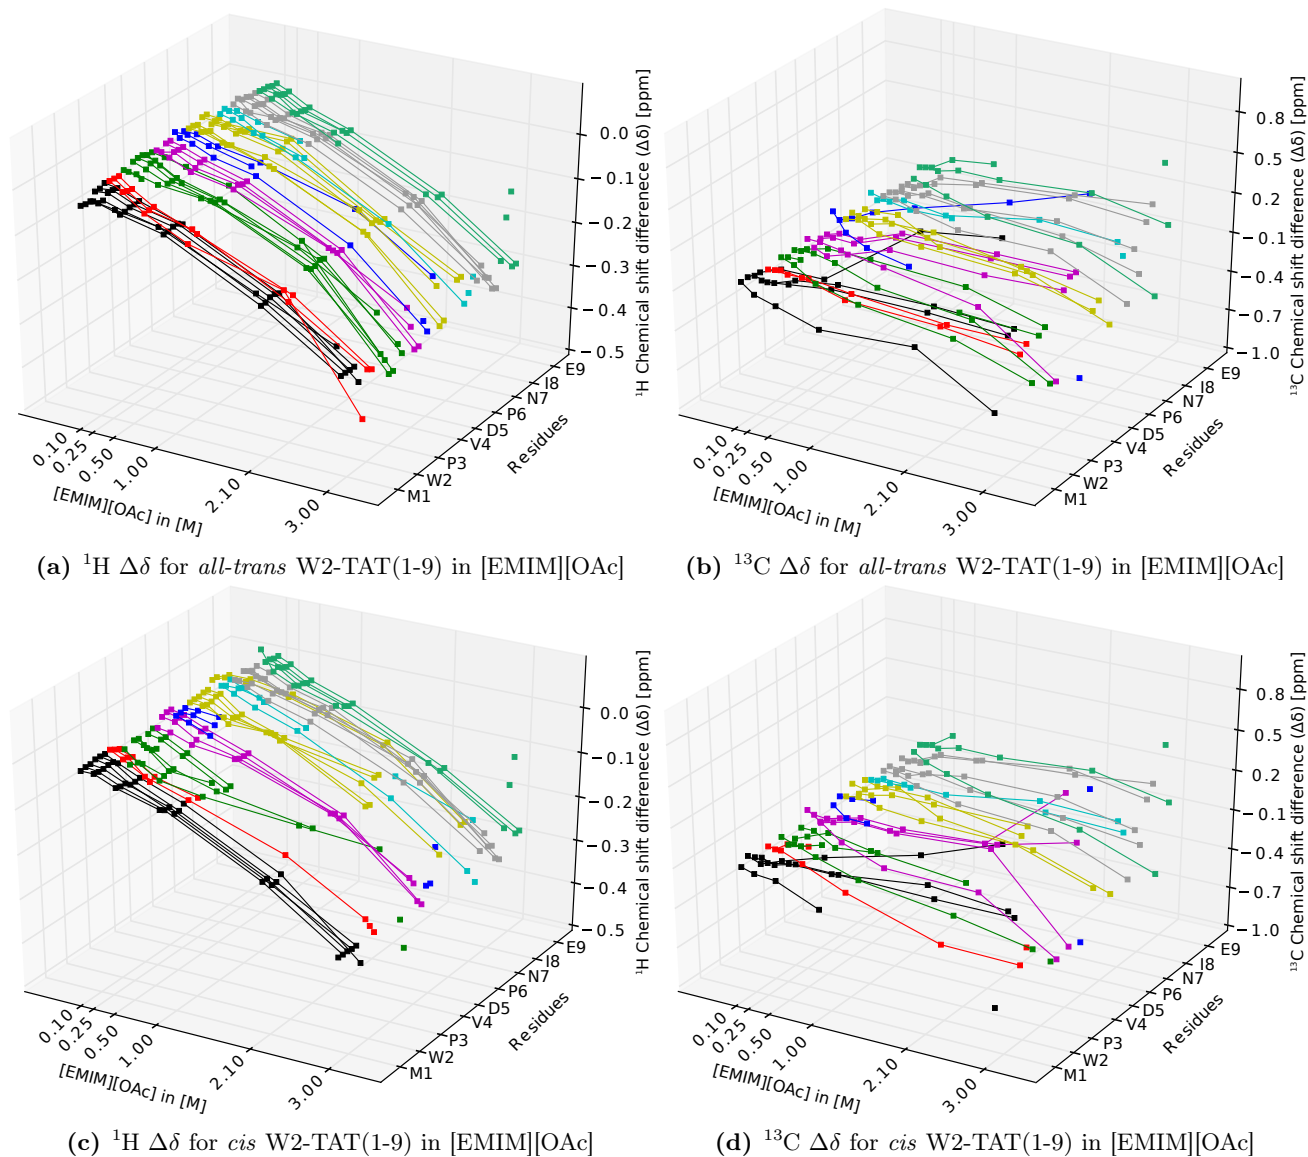

**Fig. S 10:**  $^1\text{H}$  and  $^{13}\text{C}$  chemical shift differences ( $\Delta\delta$ ) of protons and carbons for *all-trans*- (upper panel) and *cis*-configured (lower panel) W2-TAT(1-9) as function of [EMIM][OAc] concentration. The reference system was 10 mM W2-TAT(1-9), pH 6.5, in 90/10%  $\text{H}_2\text{O}/\text{D}_2\text{O}$ . The peptide concentration was 10 mM for samples up to 2.1 M [EMIM][OAc] and experiments were carried out with a 5 mm room-temperature BBI-probe. Spectra for 3 M [EMIM][OAc] were carried out with a 4 mm triple resonance HR-MAS probe at 6 kHz spinning rate and a W2-TAT(1-9) concentration of 90 mM. All NMR experiments were acquired at 303 K and the pH was adjusted to 6.5. Depicted are all  $^1\text{H}$  and  $^{13}\text{C}$   $\Delta\delta$  in sequential order per residue as given in Fig. S5 and S6.

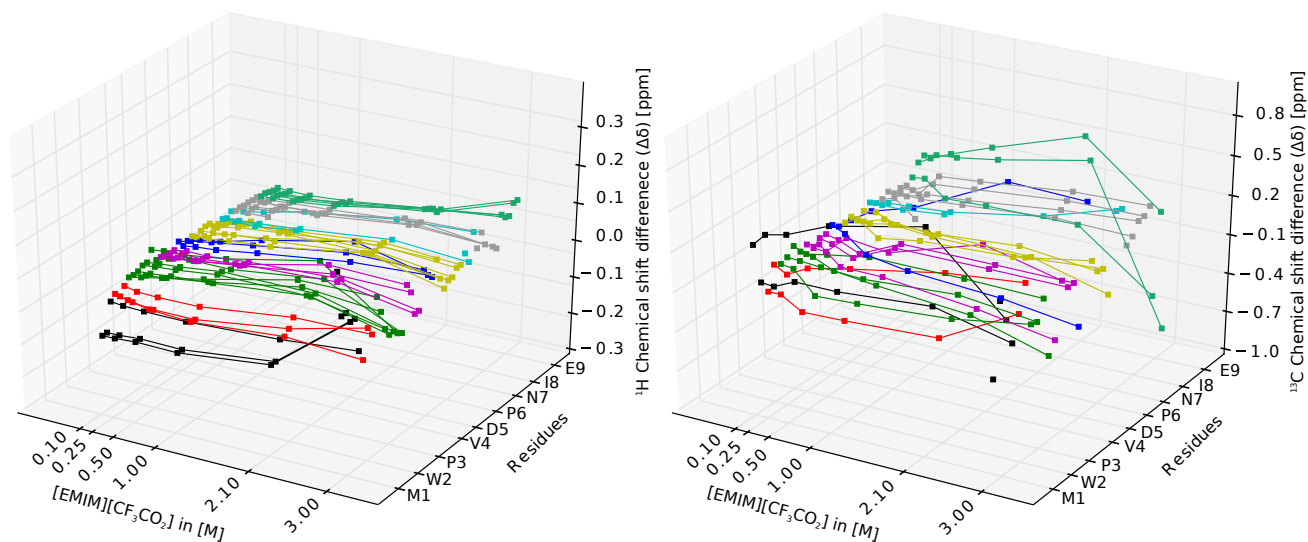

(a)  $^1\text{H}$   $\Delta\delta$  for *all-trans* W2-TAT(1-9) in [EMIM][CF<sub>3</sub>CO<sub>2</sub>] (b)  $^{13}\text{C}$   $\Delta\delta$  for *all-trans* W2-TAT(1-9) in [EMIM][CF<sub>3</sub>CO<sub>2</sub>]

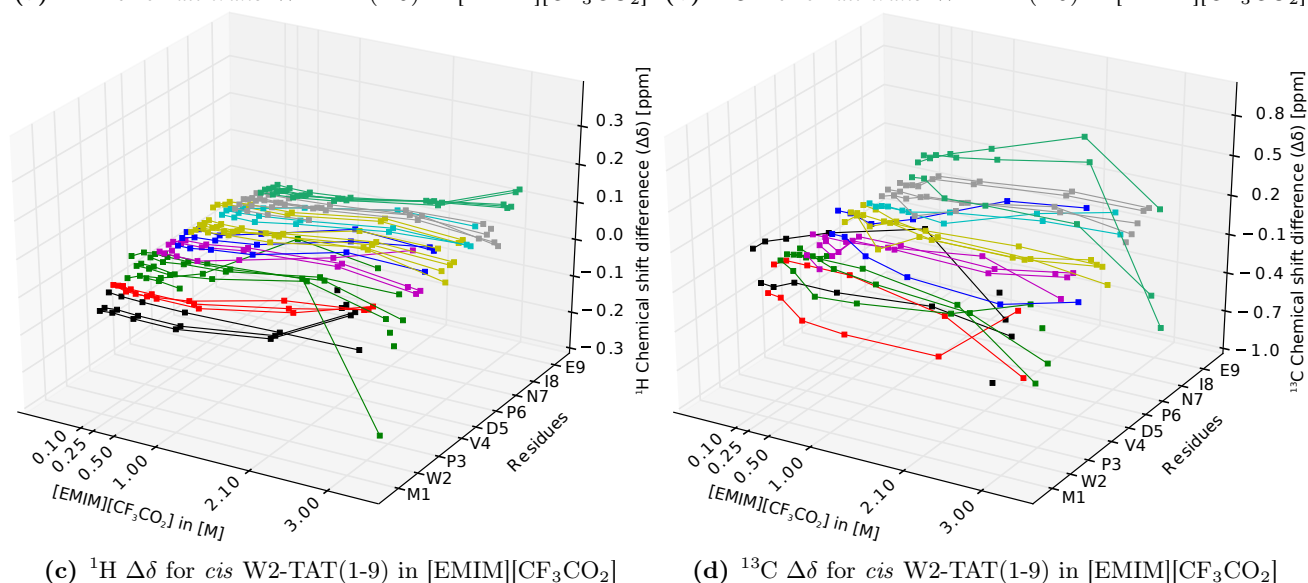

(c)  $^1\text{H}$   $\Delta\delta$  for *cis* W2-TAT(1-9) in [EMIM][CF<sub>3</sub>CO<sub>2</sub>] (d)  $^{13}\text{C}$   $\Delta\delta$  for *cis* W2-TAT(1-9) in [EMIM][CF<sub>3</sub>CO<sub>2</sub>]

**Fig. S 11:**  $^1\text{H}$  and  $^{13}\text{C}$  chemical shift differences ( $\Delta\delta$ ) of protons and carbons for *all-trans*- (upper panel) and *cis*-configured (lower panel) W2-TAT(1-9) as function of [EMIM][CF<sub>3</sub>CO<sub>2</sub>] concentration. The reference system was 10 mM W2-TAT(1-9), pH 6.5, in 90/10% H<sub>2</sub>O/D<sub>2</sub>O. The peptide concentration was 10 mM for samples up to 2.1 M [EMIM][CF<sub>3</sub>CO<sub>2</sub>] and experiments were carried out with a 5 mm room-temperature BBI-probe. Spectra for 3 M [EMIM][CF<sub>3</sub>CO<sub>2</sub>] were carried out with a 4 mm triple resonance HR-MAS probe at 6 kHz spinning rate and a W2-TAT(1-9) concentration of 90 mM. All NMR experiments were acquired at 303 K and the pH was adjusted to 6.5. Depicted are all  $^1\text{H}$  and  $^{13}\text{C}$   $\Delta\delta$  in sequential order per residue as given in Fig. S5 and S6.

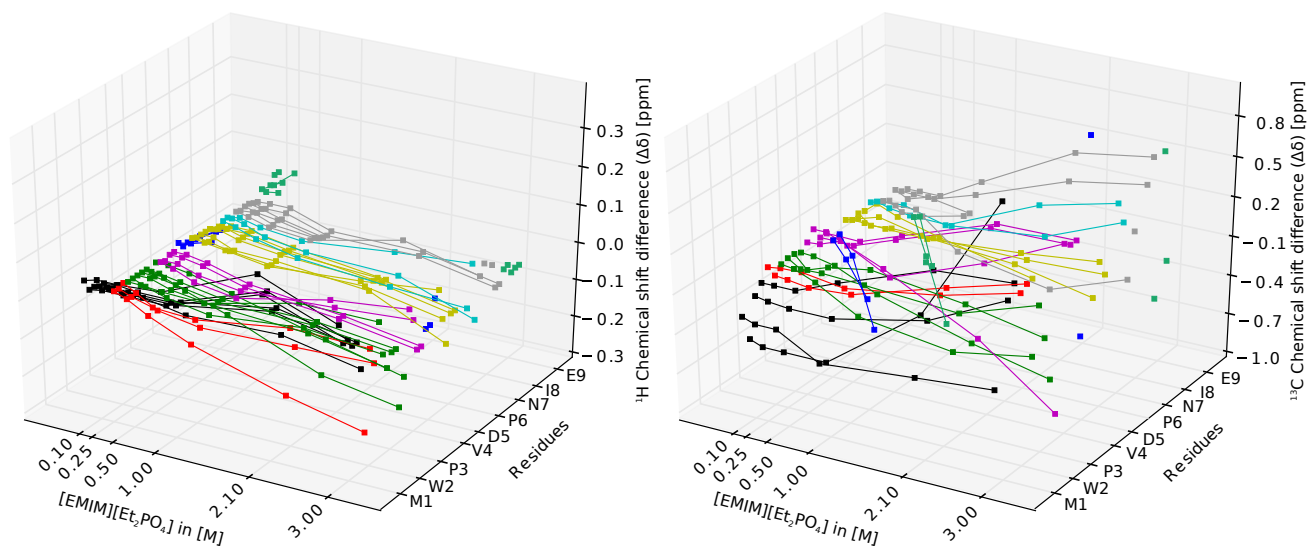

(a)  $^1\text{H}$   $\Delta\delta$  for *all-trans* W2-TAT(1-9) in [EMIM][Et<sub>2</sub>PO<sub>4</sub>] (b)  $^{13}\text{C}$   $\Delta\delta$  for *all-trans* W2-TAT(1-9) in [EMIM][Et<sub>2</sub>PO<sub>4</sub>]

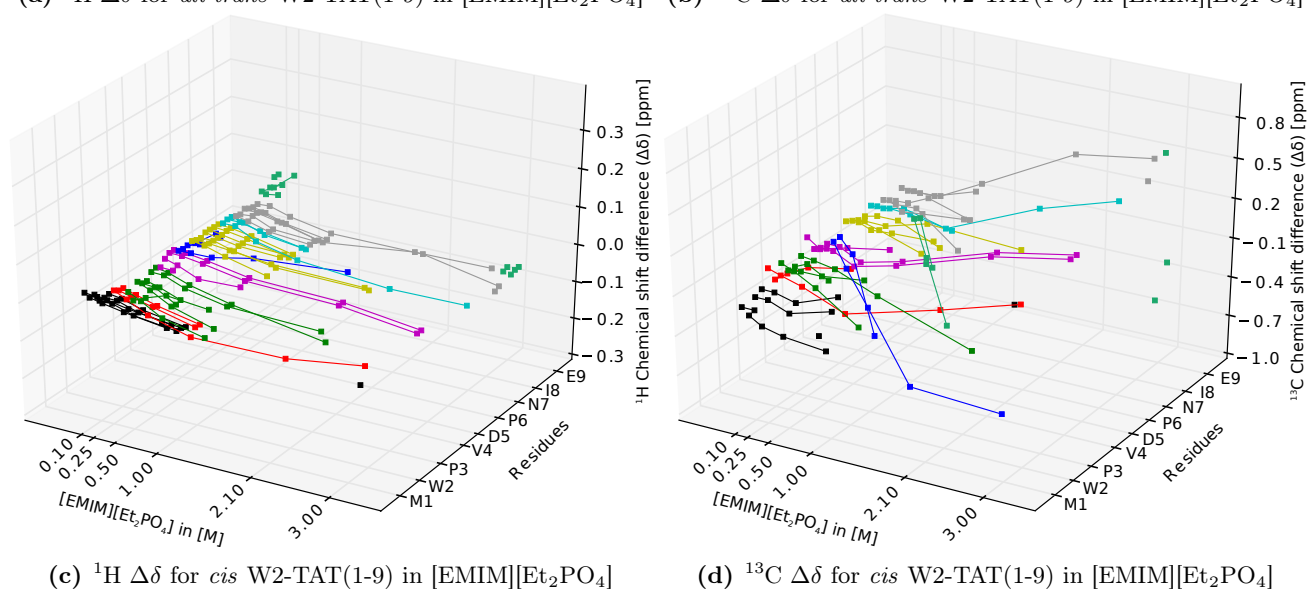

(c)  $^1\text{H}$   $\Delta\delta$  for *cis* W2-TAT(1-9) in [EMIM][Et<sub>2</sub>PO<sub>4</sub>]

(d)  $^{13}\text{C}$   $\Delta\delta$  for *cis* W2-TAT(1-9) in [EMIM][Et<sub>2</sub>PO<sub>4</sub>]

**Fig. S 12:**  $^1\text{H}$  and  $^{13}\text{C}$  chemical shift differences ( $\Delta\delta$ ) of protons and carbons for *all-trans*- (upper panel) and *cis*-configured (lower panel) W2-TAT(1-9) as function of [EMIM][Et<sub>2</sub>PO<sub>4</sub>] concentration. The reference system was 10 mM W2-TAT(1-9), pH 6.5, in 90/10% H<sub>2</sub>O/D<sub>2</sub>O. The peptide concentration was 10 mM for samples up to 2.1 M [EMIM][Et<sub>2</sub>PO<sub>4</sub>] and experiments were carried out with a 5 mm room-temperature BBI-probe. Spectra for 3 M [EMIM][Et<sub>2</sub>PO<sub>4</sub>] were carried out with a 4 mm triple resonance HR-MAS probe at 6 kHz spinning rate and a W2-TAT(1-9) concentration of 90 mM. All NMR experiments were acquired at 303 K and the pH was adjusted to 6.5. Depicted are all  $^1\text{H}$  and  $^{13}\text{C}$   $\Delta\delta$  in sequential order per residue as given in Fig. S5 and S6.

**Table S 4:** Linear regression analysis of W2-TAT(1-9)  $^1\text{H}$  and  $^{13}\text{C}$  chemical shifts in different ILs as shown in Figure S9-12. The slope is given in  $\Delta\delta/\text{M}$  [ppm/M] IL.

|                                          | <i>trans</i> |                 | <i>cis</i>   |                 |
|------------------------------------------|--------------|-----------------|--------------|-----------------|
|                                          | $^1\text{H}$ | $^{13}\text{C}$ | $^1\text{H}$ | $^{13}\text{C}$ |
| [EMIM][Br]                               | 0.083±0.019  | 0.119±0.074     | 0.092±0.029  | 0.071±0.046     |
| [EMIM][Et <sub>2</sub> PO <sub>4</sub> ] | -0.024±0.034 | -0.059±0.153    | -0.047±0.037 | -0.123±0.252    |
| [EMIM][CF <sub>3</sub> CO <sub>2</sub> ] | 0.013±0.021  | -0.001±0.083    | 0.010±0.041  | -0.035±0.117    |
| [EMIM][OAc]                              | -0.096±0.019 | -0.108±0.069    | -0.067±0.035 | -0.101±0.123    |

**Table S 5:** Effect of ILs and 0.5 M LiCl in TFE on the W2-TAT(1-9) *all-trans/cis* equilibrium state obtained by  $^1\text{H}$  NMR spectroscopy. Presented are the *cis*-population contents. Conditions: 10 mM W2-TAT(1-9), pH adjusted to 6.5, were dissolved in the respective IL. The reference system was 10 mM W2-TAT(1-9), pH 6.5, in 90/10% H<sub>2</sub>O/D<sub>2</sub>O.

| Solvent system                           | IL concentration |       |        |       |      |       |      |
|------------------------------------------|------------------|-------|--------|-------|------|-------|------|
|                                          | 0 M              | 0.1 M | 0.25 M | 0.5 M | 1 M  | 2.1 M | 3 M  |
| H <sub>2</sub> O/D <sub>2</sub> O        | 0.46             |       |        |       |      |       |      |
| TFE-d <sub>3</sub> / 0.5M LiCl           | 0.64             |       |        |       |      |       |      |
| [EMIM][OAc]                              | 0.47             | 0.48  | 0.46   | 0.42  | 0.38 | 0.32  | 0.27 |
| [MMIM][Me <sub>2</sub> PO <sub>4</sub> ] | 0.49             | 0.42  | 0.39   | 0.36  | 0.32 | 0.30  | 0.29 |
| [EMIM][Me <sub>2</sub> PO <sub>4</sub> ] | 0.47             | 0.40  | 0.36   | 0.33  | 0.29 | 0.28  | 0.29 |
| [EMIM][Et <sub>2</sub> PO <sub>4</sub> ] | 0.48             | 0.48  | 0.47   | 0.44  | 0.43 | 0.37  | 0.33 |
| [EMIM][CF <sub>3</sub> CO <sub>2</sub> ] | 0.45             | 0.38  | 0.34   | 0.29  | 0.26 | 0.27  | 0.29 |
| [EMIM][Cl]                               | 0.47             | 0.45  | 0.42   | 0.39  | 0.37 | 0.35  | 0.31 |
| [EMIM][Br]                               | 0.47             | 0.39  | 0.36   | 0.35  | 0.31 | 0.35  | 0.30 |
| [EMIM][SCN]                              | 0.46             | 0.40  | 0.38   | 0.35  | 0.35 | 0.25  | 0.29 |

## References Supplementary Data

- [1] Christoph Wiedemann, Peter Bellstedt, and Matthias Görlach. Capito—a web server-based analysis and plotting tool for circular dichroism data. *Bioinformatics*, 29(14):1750–1757, Jul 2013.
- [2] Vladimir N. Uversky. Natively unfolded proteins: a point where biology waits for physics. *Protein Sci*, 11(4):739–756, Apr 2002.
- [3] N. Sreerama and R. W. Woody. Estimation of protein secondary structure from circular dichroism spectra: comparison of CONTIN, SELCON, and CDSSTR methods with an expanded reference set. *Anal Biochem*, 287(2):252–260, Dec 2000.
- [4] W. Kabsch and C. Sander. Dictionary of protein secondary structure: pattern recognition of hydrogen-bonded and geometrical features. *Biopolymers*, 22(12):2577–2637, Dec 1983.
- [5] Alfonso De Simone, Andrea Cavalli, Shang-Te Danny Hsu, Wim Vranken, and Michele Vendruscolo. Accurate random coil chemical shifts from an analysis of loop regions in native states of proteins. *J Am Chem Soc*, 131(45):16332–16333, Nov 2009.
- [6] Mario Schubert, Dirk Labudde, Hartmut Oschkinat, and Peter Schmieder. A software tool for the prediction of Xaa-Pro peptide bond conformations in proteins based on  $^{13}\text{C}$  chemical shift statistics. *J Biomol NMR*, 24(2):149–154, Oct 2002.
- [7] Yang Shen and Ad Bax. Prediction of Xaa-Pro peptide bond conformation from sequence and chemical shifts. *J Biomol NMR*, 46(3):199–204, Mar 2010.
